# Supplementary material
Source: ML conference proceedings conference paper supplement (https://openreview.net/forum?id=1oE7YizXHf)

## GAS

Log Likelihood

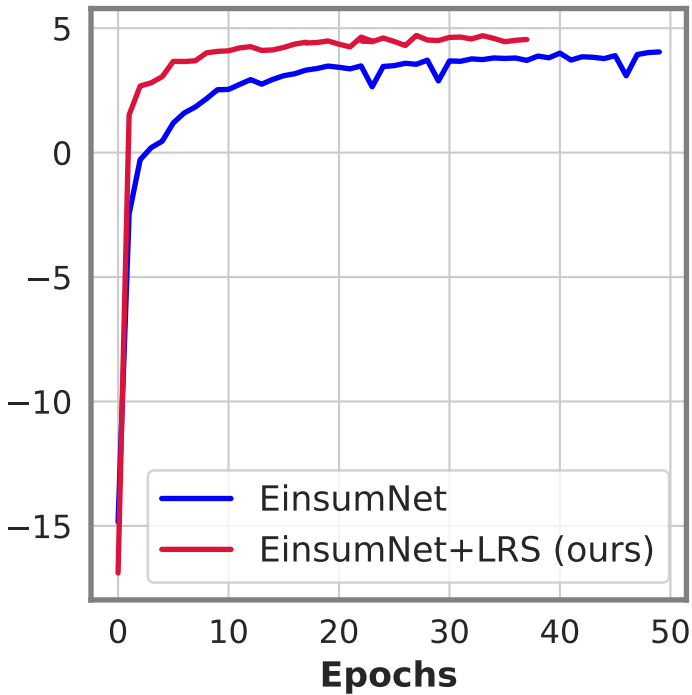

Supplement: supplementary_material [file attachment]

## InterlockedCIRCLES

Log Likelihood

$-2^2$

$-2^3$

0

25

50

75

100

125

150

175

Epochs

- EinsumNet
- EinsumNet+Affine
- EinsumNet+LRS (ours)

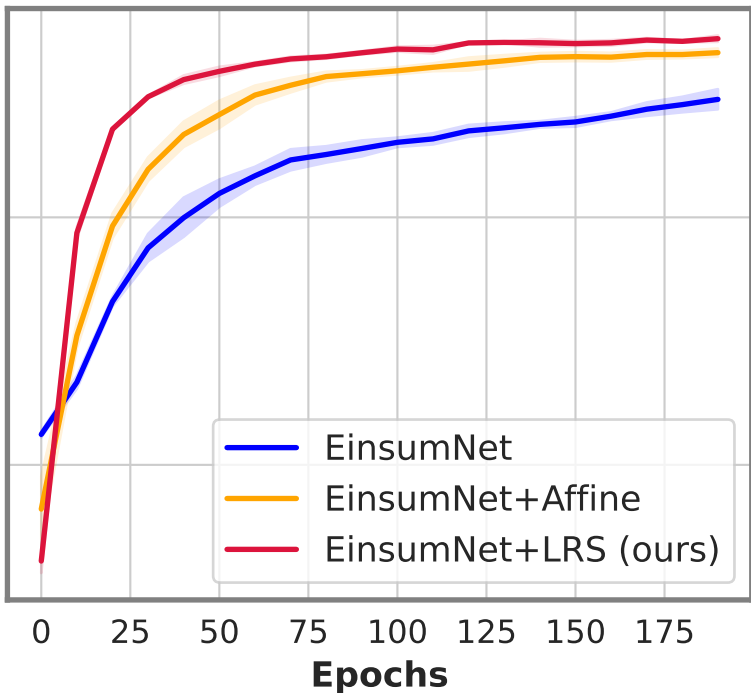

Supplement: supplementary_material [file attachment]

# HELIX

Log Likelihood

$-2^1$   
 $-2^2$   
 $-2^3$   
 $-2^4$

0

25

50

75

100

125

150

175

Epochs

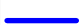

EinsumNet

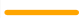

EinsumNet+Affine

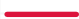

EinsumNet+LRS (ours)

Supplement: supplementary_material [file attachment]

# BentLISSAJOUS

Log Likelihood

$-2^2$

$-2^3$

0

25

50

75

100

125

150

175

Epochs

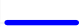

EinsumNet

EinsumNet+Affine

EinsumNet+LRS (ours)

Supplement: supplementary_material [file attachment]

## DisjointCIRCLES

Log Likelihood

$-2^1$

$-2^2$

$-2^3$

0

25

50

75

100

125

150

175

Epochs

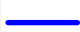

EinsumNet

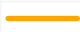

EinsumNet+Affine

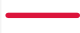

EinsumNet+LRS (ours)

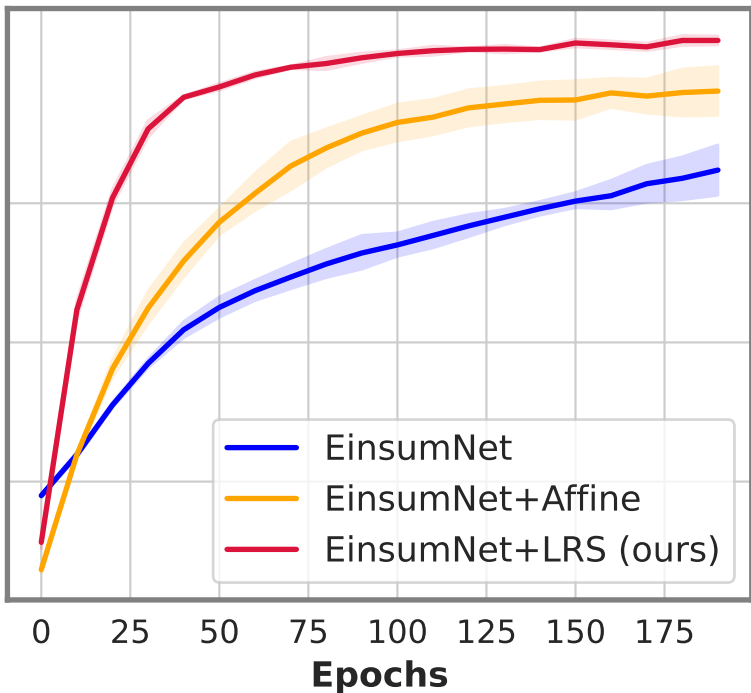

Supplement: supplementary_material [file attachment]

# MINIBOONE

Log Likelihood

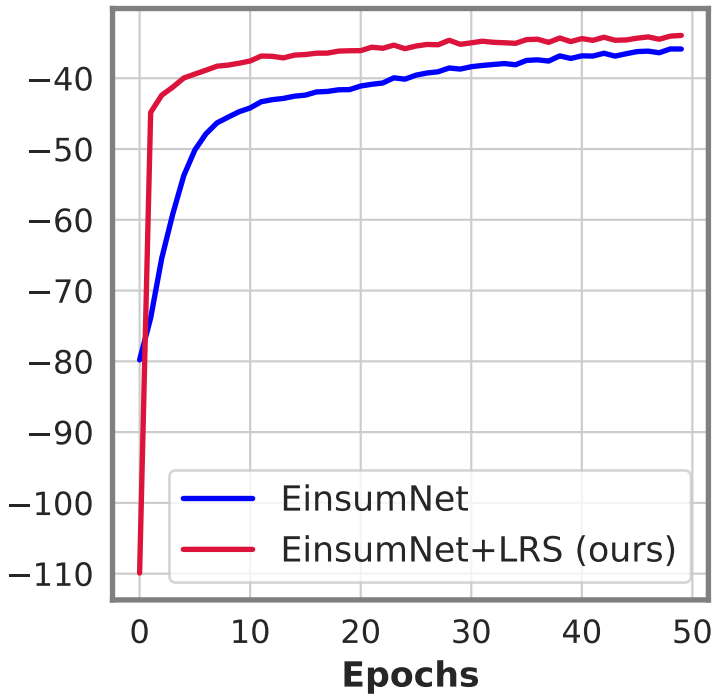

Supplement: supplementary_material [file attachment]

## KNOTTED

Log Likelihood

$-2^2$

$-2^3$

$-2^4$

0

25

50

75

100

125

150

175

Epochs

- EinsumNet
- EinsumNet+Affine
- EinsumNet+LRS (ours)

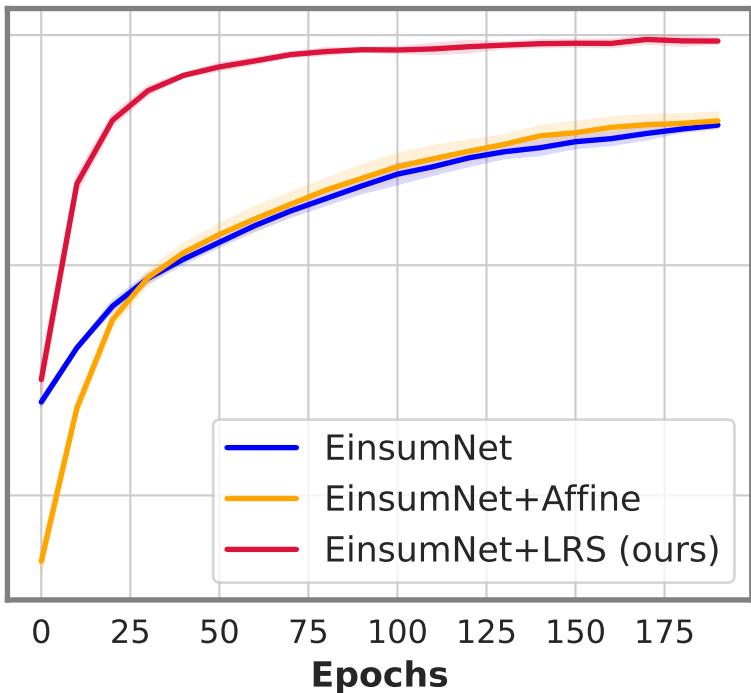

Supplement: supplementary_material [file attachment]

# FMNIST

Log Likelihood

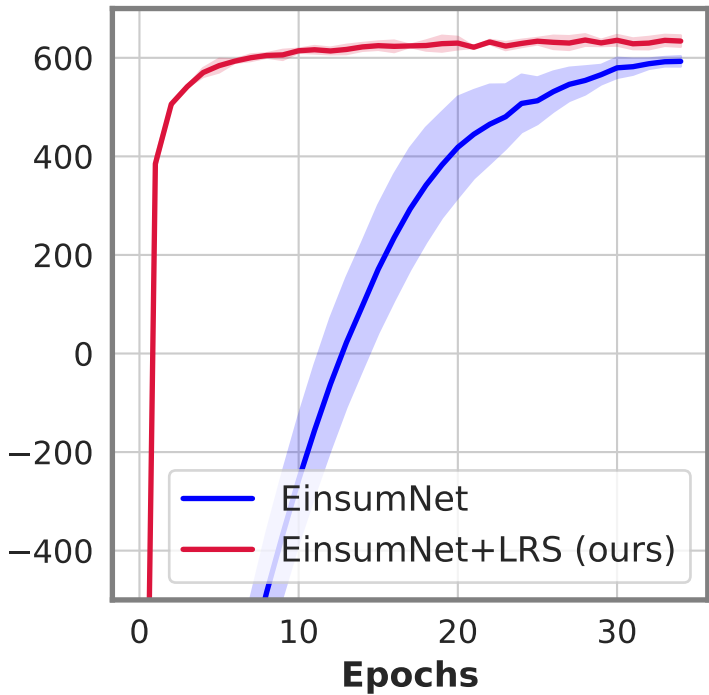

Supplement: supplementary_material [file attachment]

# MNIST

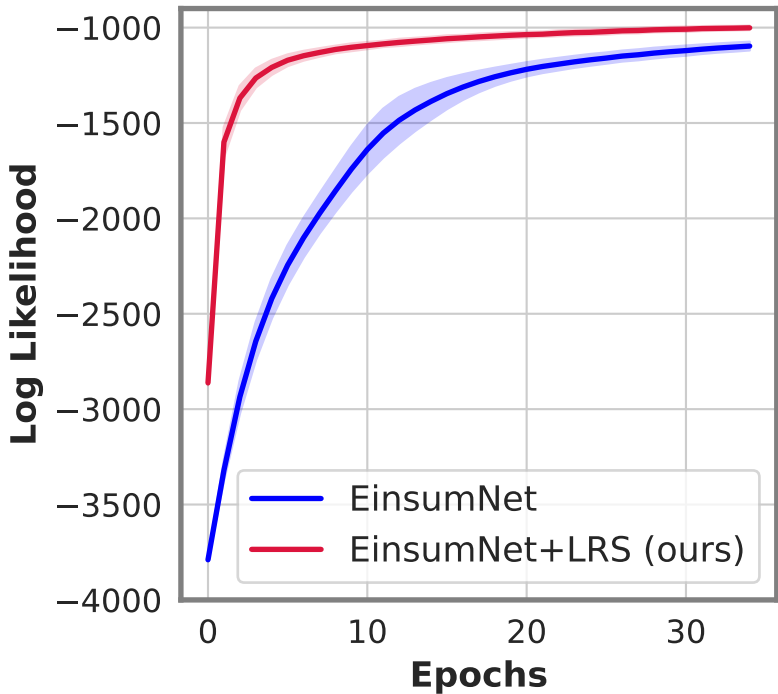

Supplement: supplementary_material [file attachment]

## TwistedEIGHT

Log Likelihood

$-2^2$

$-2^3$

0

25

50

75

100

125

150

175

Epochs

- EinsumNet
- EinsumNet+Affine
- EinsumNet+LRS (ours)

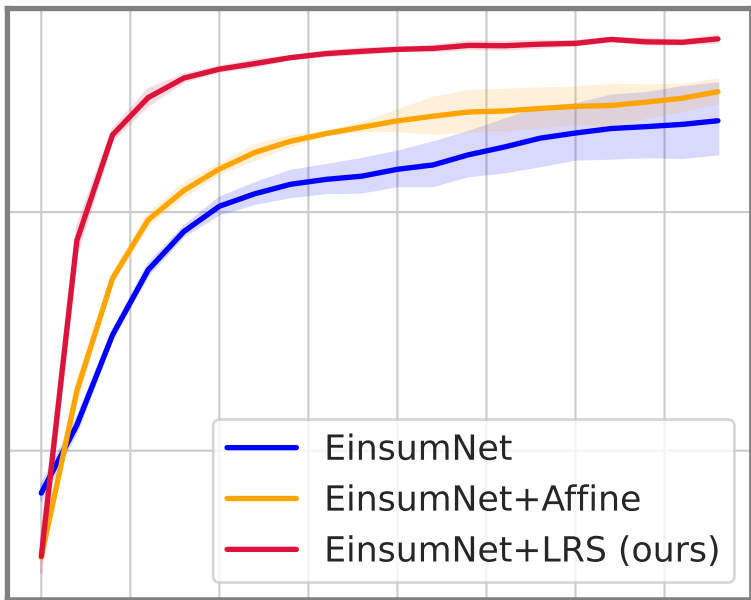

Supplement: supplementary_material [file attachment]

# MNIST

Log Likelihood

-1000  
-1100  
-1200  
-1300  
-1400  
-1500  
-1600  
-1700

$2^0$   $2^1$   $2^2$   $2^3$   $2^4$   $2^5$

K

EinsumNet+LRS (ours)  
EinsumNet

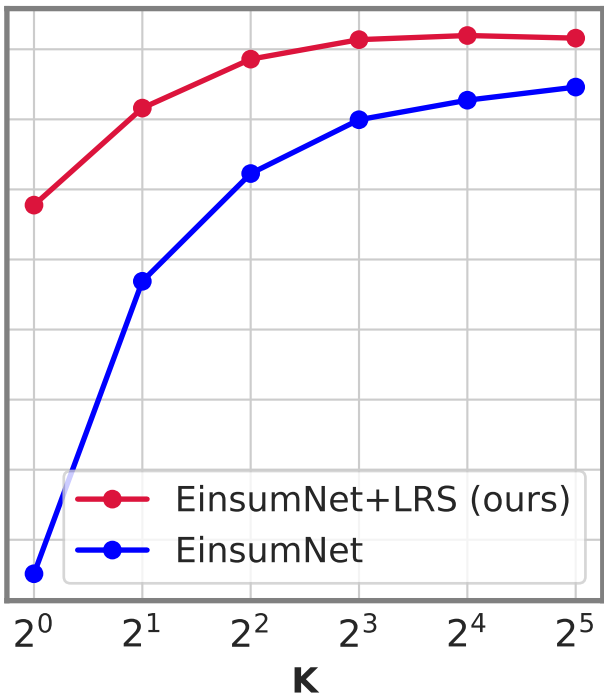

Supplement: supplementary_material [file attachment]
